# Supplementary material for: Ligand biodegradation-induced surface reconstruction of magnetite nanoparticles: potentially overlooked toxicity
Source: Royal Society of Chemistry journal article supplement (doi:10.1039/d1en00724f), 2021-11-24
Supplement: d1en00724f1.pdf [file d1en00724f1.pdf]

## Supplementary Information

### Ligand biodegradation induced surface reconstruction of magnetite nanoparticles: Potential overlooked toxicity

Huiru Zhao<sup>a,b</sup>, Hongyan Meng<sup>b</sup>, Qiurong Zhang<sup>c</sup>, Yining Wu<sup>a</sup>, Haotian Chen<sup>d</sup>, Xiaoman

Jiang<sup>a</sup>, Chengdong Zhang<sup>a, \*</sup>

<sup>a</sup> School of Environment, Beijing Normal University, Beijing 100857, China.

<sup>b</sup> College of Environmental Science and Engineering, Nankai University, Tianjin 300350, China

<sup>c</sup> Institutes of Physical Science and Information Technology, Anhui University, Hefei 230601, China

<sup>d</sup> School of Electronics Engineering and Computer Science, Peking University, Beijing 100871, China

Manuscript prepared for *Environmental Science: Nano*

\* Corresponding author: Chengdong Zhang (Email: zhangchengdong@bnu.edu.cn)

Number of pages: 9

Number of tables: 1

Number of figures: 6

## **Materials and Methods**

### **Elemental analysis of various nanoparticles (NPs)**

$\text{Fe}_3\text{O}_4\text{-HA}_\text{H}$ ,  $\text{Fe}_3\text{O}_4\text{-HA}_\text{L}$  and  $\text{Fe}_3\text{O}_4\text{-HA}_\text{R}$  (20 mg Fe/L) were suspended in 1 mL of ultrapure water. Two microliter of each suspension was dropped onto a transmission electron microscopy (TEM) grid (Zhongjing Keyi, China) and the samples were air dried overnight. The elemental analysis was performed by energy dispersive spectrometer (EDS) coupled with TEM (JEM-2800F, Hitach, Japan) at 200 kV accelerating voltage.

### **Prussia blue stain Assay**

J774A.1 cells were incubated with 20 mg-Fe/L of  $\text{Fe}_3\text{O}_4\text{-HA}_\text{H}$ ,  $\text{Fe}_3\text{O}_4\text{-HA}_\text{L}$  and  $\text{Fe}_3\text{O}_4\text{-HA}_\text{R}$  in dulbecco's modified eagle medium (DMEM, pH 7.4) for 12 h at 37 °C, respectively. The cells were fixed by 4% paraformaldehyde for 30 min. Then the cells were rinsed with phosphate buffered solution (PBS) and stained with 1 mL of 2% potassium ferrocyanide in 6% hydrochloric acid (Perl reagent for Prussian blue staining, Yisheng BioTECH, Shanghai, China) for 30 min. After wash, the cells were examined with a confocal laser scanning microscope (CLSM, LSM880 with Airyscan, Zeiss, Germany).

**Table S1.** The wavelength of peaks in FTIR spectra and corresponding functional groups

| <b>Functional Group</b> | <b>Sample</b> | <b>HA<br/>(cm<sup>-1</sup>)</b> | <b>Fe<sub>3</sub>O<sub>4</sub>-HA<sub>H</sub><br/>(cm<sup>-1</sup>)</b> | <b>Fe<sub>3</sub>O<sub>4</sub>-HA<sub>L</sub><br/>(cm<sup>-1</sup>)</b> | <b>Fe<sub>3</sub>O<sub>4</sub>-HA<sub>R</sub><br/>(cm<sup>-1</sup>)</b> |
|-------------------------|---------------|---------------------------------|-------------------------------------------------------------------------|-------------------------------------------------------------------------|-------------------------------------------------------------------------|
| <b>O-H</b>              |               | 3393                            | 3421                                                                    | 3400                                                                    | 3490                                                                    |
| <b>C=O</b>              |               | 1616                            | 1614                                                                    | 1616                                                                    | 1647                                                                    |
| <b>COO<sup>-</sup></b>  |               | 1407                            | 1411                                                                    | 1406                                                                    | 1384                                                                    |
| <b>C-O</b>              |               | 1047                            | 1045                                                                    | 1043                                                                    | 1024                                                                    |

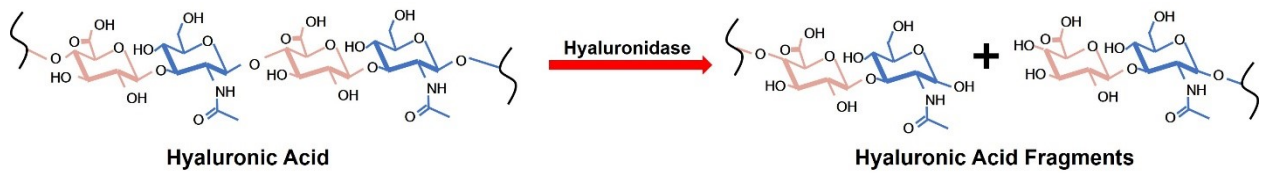

**Fig. S1.** Hydrolysis of hyaluronic acid by hyaluronidase.

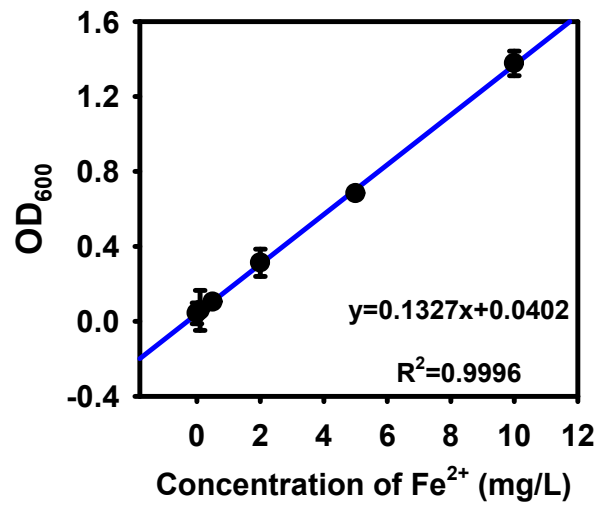

**Fig. S2.** A calibration curve of Fe<sup>2+</sup>-phenanthroline complex.

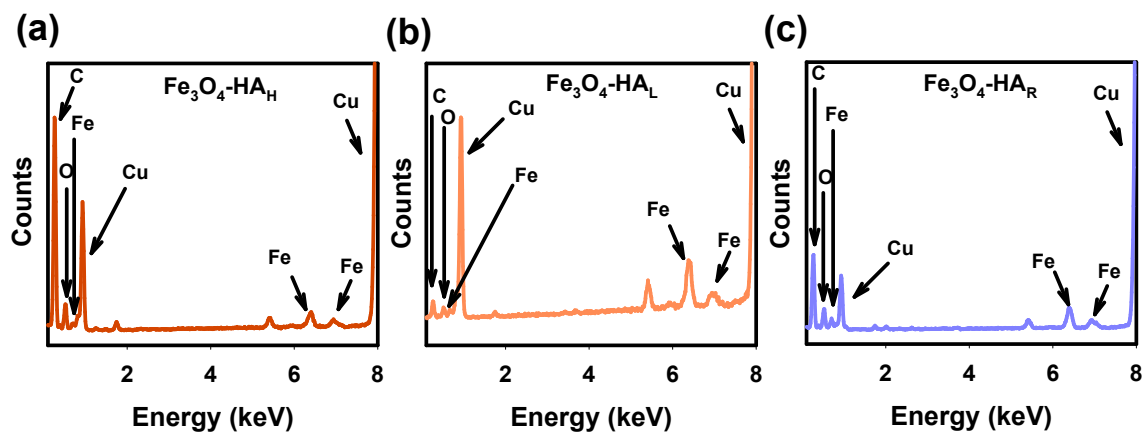

**Fig. S3.** EDS spectra of (a)  $\text{Fe}_3\text{O}_4\text{-HA}_\text{H}$ , (b)  $\text{Fe}_3\text{O}_4\text{-HA}_\text{L}$  and (c)  $\text{Fe}_3\text{O}_4\text{-HA}_\text{R}$ .

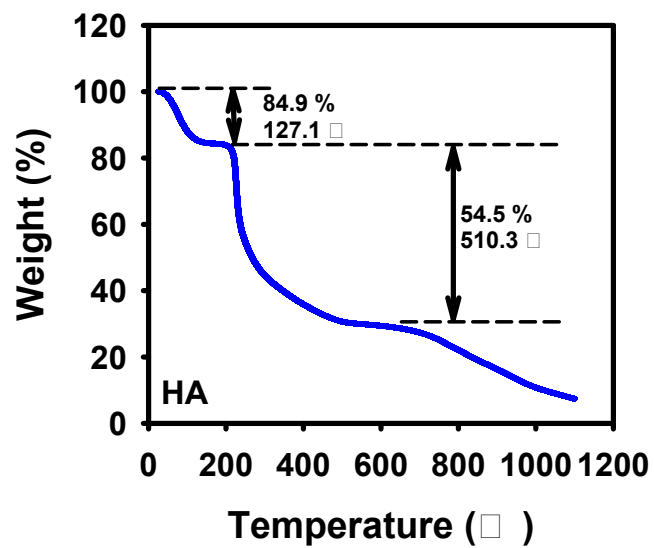

**Fig. S4.** TGA thermogram of HA.

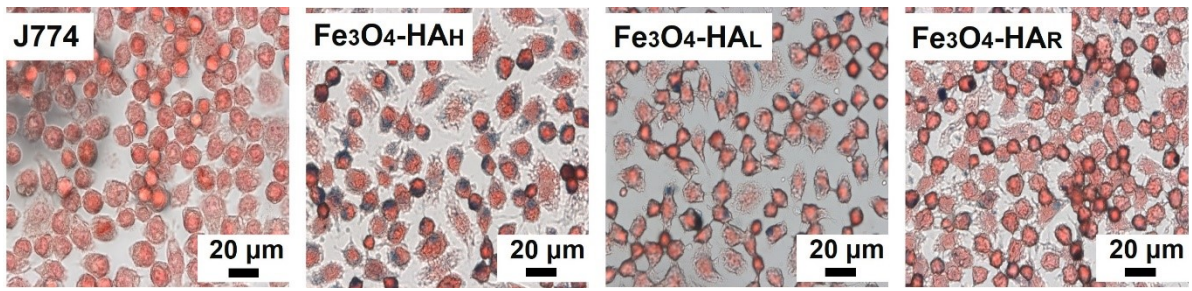

**Fig. S5.** Prussia blue stain images indicating iron in J774 cells treated with various NPs (20 mg Fe/L) for 12 h.



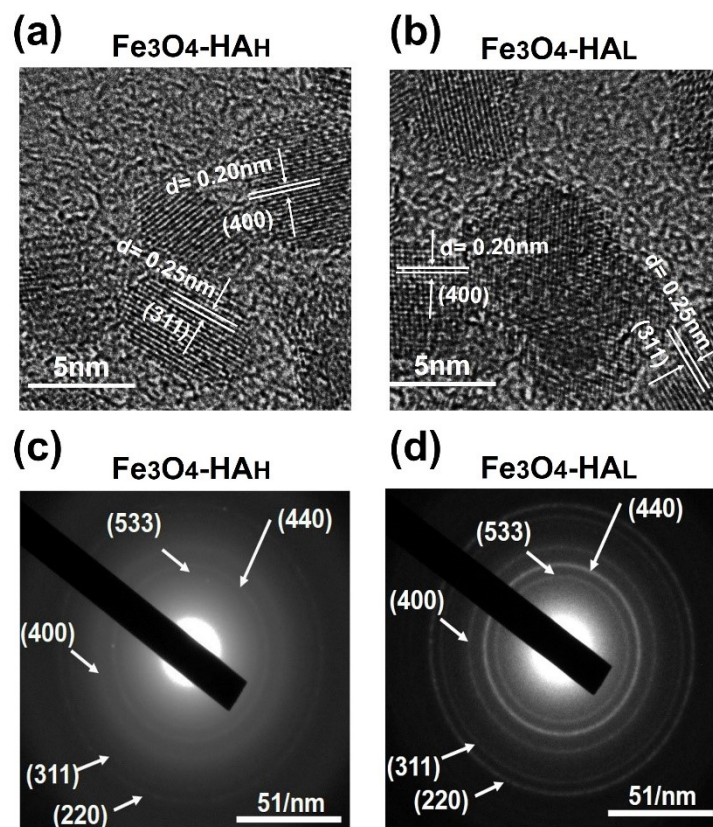

**Fig. S6.** HRTEM images showing lattice fringes of (a) Fe<sub>3</sub>O<sub>4</sub>-HA<sub>H</sub> and (b) Fe<sub>3</sub>O<sub>4</sub>-HA<sub>L</sub>; SAED patterns of (c) Fe<sub>3</sub>O<sub>4</sub>-HA<sub>H</sub> and (d) Fe<sub>3</sub>O<sub>4</sub>-HA<sub>L</sub>.
